# Supplementary material for: DFT screening of metallic single-replacements for lead-free perovskites with intrinsic photovoltaic functionalities
Source: Royal Society of Chemistry journal article supplement (doi:10.1039/d0ra03034a), 2020-01-01
Supplement: d0ra03034a1.pdf [file d0ra03034a1.pdf]

## **Supplementary Information: Screening of Metallic Single-Replacements for Lead-free Perovskites with Intrinsic Photovoltaic Functionalities**

Clark Zhang and Xuan Luo\*

*National Graphene Research and Development Center, Springfield, Virginia 22151, USA*

PACS numbers:

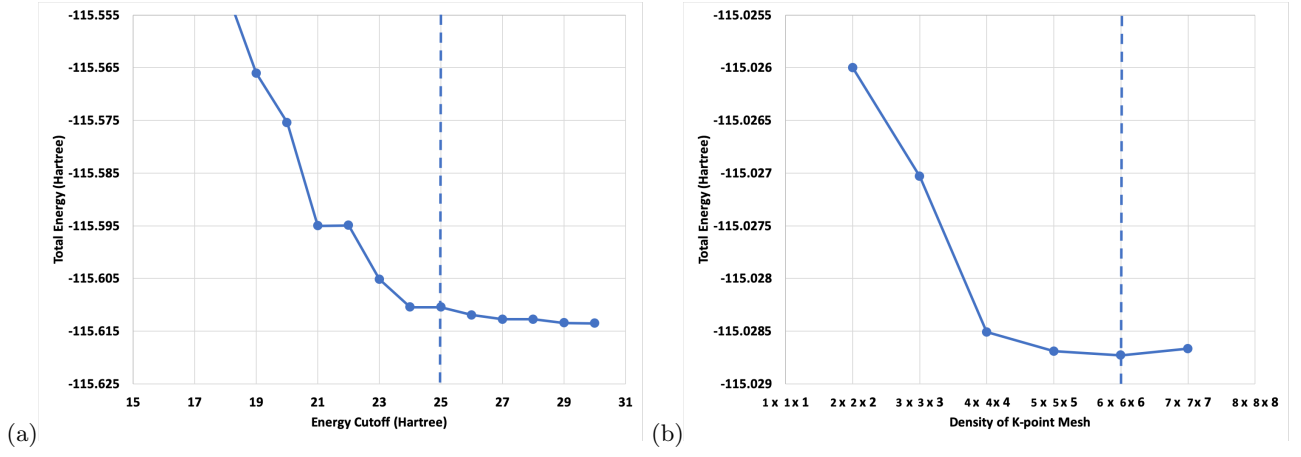

FIG. S1: Convergence studies in the (a) energy cutoff and (b) K-point mesh density. The dotted lines represent the values at which the total energy was converged to five decimal places.

TABLE S1: Structural and Thermal Properties of Calculated Perovskites (PBE unless specified)

| Material            | Tolerance Factor | Tolerance Factor (prev.) | Octahedral Factor | $\Delta H$ (eV/f.u.) | $\Delta H$ (eV/f.u.) (prev.) |
|---------------------|------------------|--------------------------|-------------------|----------------------|------------------------------|
| MAPbI <sub>3</sub>  | 0.912            | 0.9 <sup>1</sup>         | 0.541             | -0.381               | 0.097 <sup>2</sup>           |
| MASiI <sub>3</sub>  | 1.188            | 1.2 <sup>1</sup>         | 0.182             | -2.101               | -2.1 <sup>1</sup>            |
| MAVI <sub>3</sub>   | 1.033            | -                        | 0.359             | -4.272               | -                            |
| MACrI <sub>3</sub>  | 1.055            | -                        | 0.332             | -3.238-              | -                            |
| MAMnI <sub>3</sub>  | 1.077            | -0.305                   | 0.163             | -                    | -                            |
| MAFeI <sub>3</sub>  | 1.100            | -                        | 0.277             | 1.850                | -                            |
| MACoI <sub>3</sub>  | 1.084            | -                        | 0.295             | -1.905               | -                            |
| MANiI <sub>3</sub>  | 1.069            | -                        | 0.314             | -0.626               | -                            |
| MACuI <sub>3</sub>  | 1.055            | -                        | 0.332             | 4.716                | -                            |
| MAZnI <sub>3</sub>  | 1.003            | 1.1 <sup>1</sup>         | 0.400             | -3.129               | -0.3 <sup>1</sup>            |
| MAGaI <sub>3</sub>  | 1.096            | 1.1 <sup>1</sup>         | 0.282             | -3.075               | 0.2 <sup>1</sup>             |
| MAGeI <sub>3</sub>  | 1.055            | 1.0 <sup>1</sup>         | 0.332             | -3.537               | 0.1 <sup>1</sup>             |
| MAMoI <sub>3</sub>  | 1.069            | -                        | 0.314             | -2.612               | -                            |
| MARhI <sub>3</sub>  | 1.079            | -                        | 0.302             | 6.095                | -                            |
| MARuI <sub>3</sub>  | 1.073            | -                        | 0.309             | -4.680               | -                            |
| MAPdI <sub>3</sub>  | 1.010            | -                        | 0.391             | -1.116               | -                            |
| MAInI <sub>3</sub>  | 1.030            | -                        | 0.364             | -2.612               | -                            |
| MASnI <sub>3</sub>  | 1.069            | 0.9 <sup>1</sup>         | 0.314             | -3.342               | -0.2 <sup>1</sup>            |
| MASbI <sub>3</sub>  | 0.957            | -                        | 0.468             | 3.401                | -                            |
| MAWI <sub>3</sub>   | 1.044            | -                        | 0.345             | -3.401               | -                            |
| MAReI <sub>3</sub>  | 1.092            | -                        | 0.286             | 2.014                | -                            |
| MAIrI <sub>3</sub>  | 1.073            | -                        | 0.309             | -0.299               | -                            |
| MAPtI <sub>3</sub>  | 1.030            | -                        | 0.468             | -4.626               | -                            |
| MABiI <sub>3</sub>  | 0.957            | -                        | 0.468             | -117.662             | -                            |
| MAZnCl <sub>3</sub> | 1.065            | -                        | 0.527             | -13.70               | -                            |

<sup>1</sup> R. Ali, G.-J. Hou, Q.-B. Zhu, Z.-G. Yan, Q.-R. Zheng and G. Su, *J. Mater. Chem. A*, 2018, **6**, 9220–9227.

<sup>2</sup> G. P. Nagabhushanaa, R. Shivaramaiaha and A. Navrotsky, *J. of App. Physics.*, 2016, **28**, 77177721.

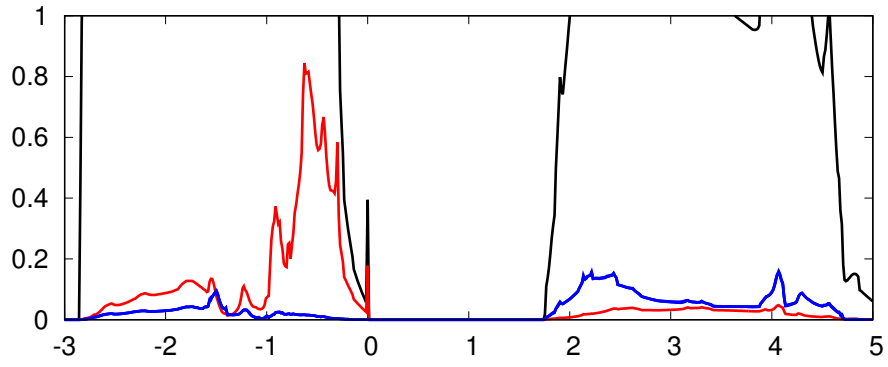

FIG. S2: Total Density of States for  $\text{MAPbI}_3$  with the partial Density of States of Pb in red and I in blue.

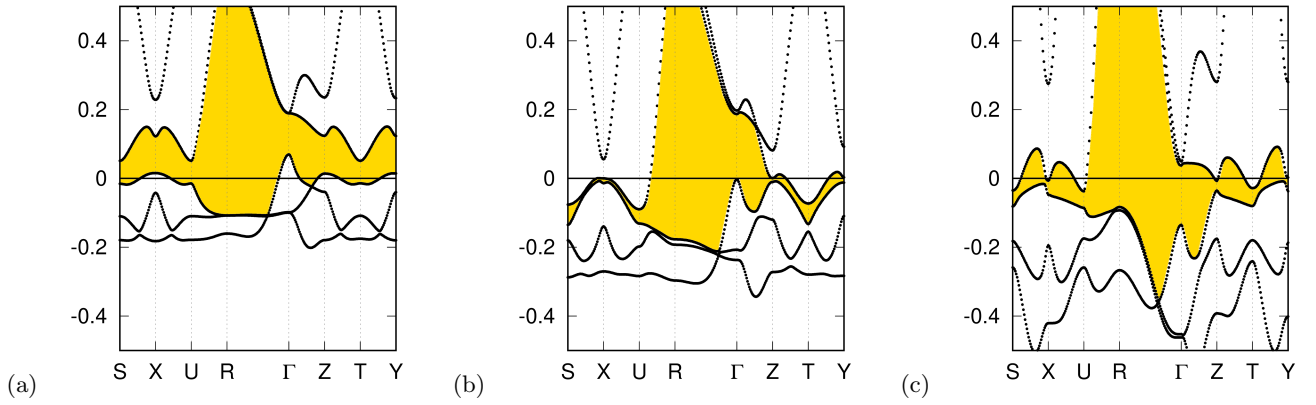

FIG. S3: A close up on (a)  $\text{MAMnI}_3$ , (b)  $\text{MAFeI}_3$ , (c)  $\text{MARuI}_3$  whose band gaps opened up when triiodide is replaced with tribromide. The yellow region represents the band gap.

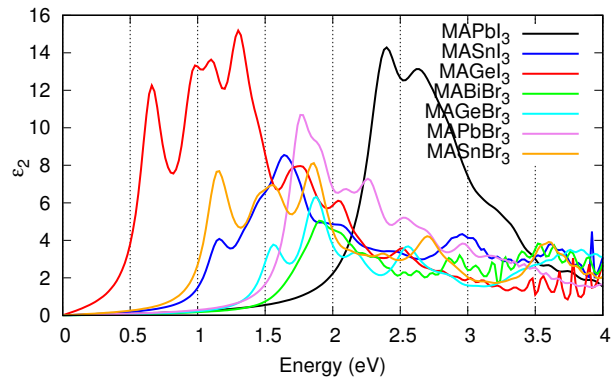

FIG. S4: Imaginary part of the calculated dielectric function,  $\epsilon_2$  of  $\text{MAPbI}_3$  in black,  $\text{MASnI}_3$  in blue,  $\text{MAGeI}_3$  in red,  $\text{MABiBr}_3$  in green,  $\text{MAGeBr}_3$  in cyan,  $\text{MAPbBr}_3$  in pink,  $\text{MASnBr}_3$  in orange

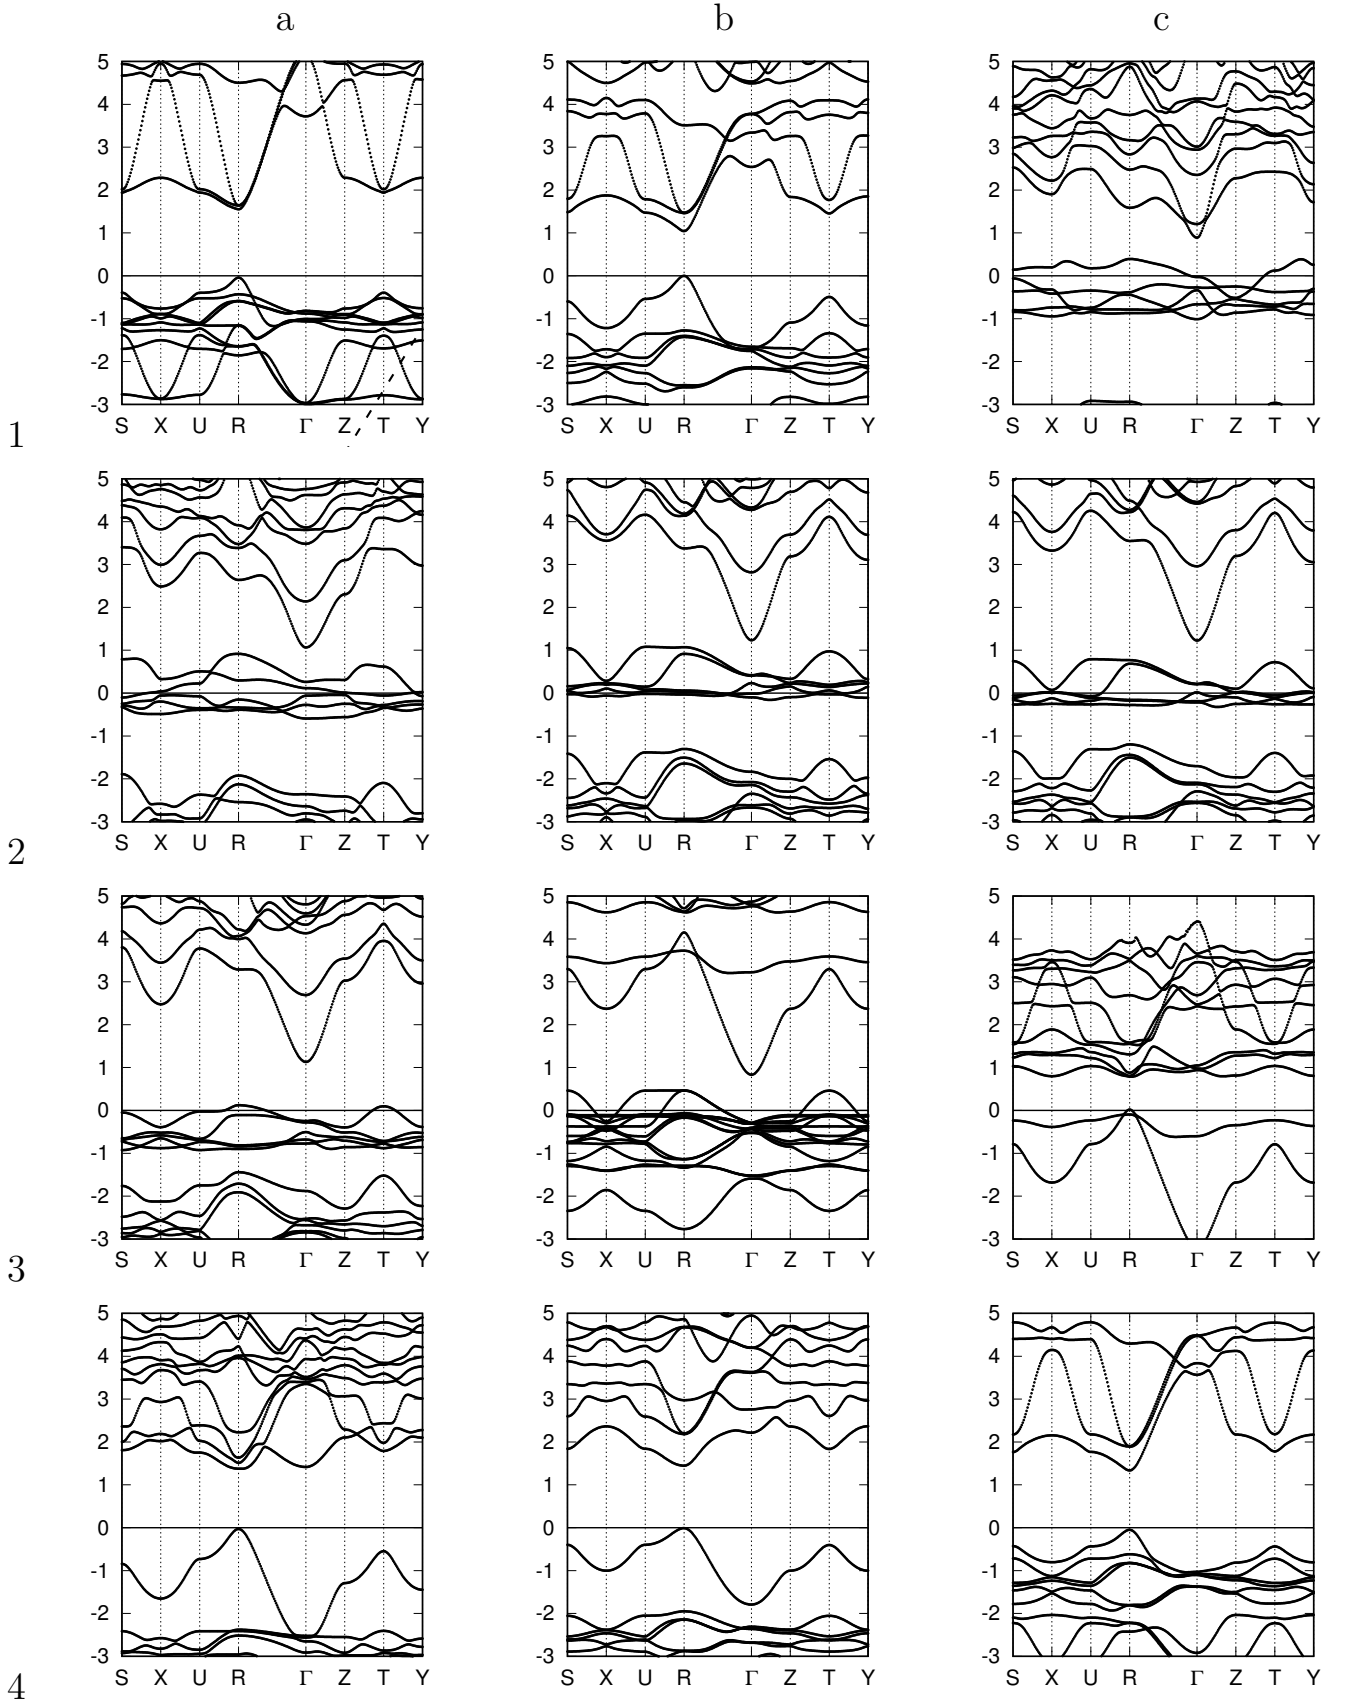

FIG. S5: Band structures shifted so the Fermi energy is at 0 eV

1a:  $\text{MAPbI}_3$  1b:  $\text{MASiI}_3$  1c:  $\text{MAVI}_3$   
 2a:  $\text{MACrI}_3$  2b:  $\text{MAMnI}_3$  2c:  $\text{MAFeI}_3$   
 3a:  $\text{MACoI}_3$  3b:  $\text{MANiI}_3$  3c:  $\text{MACuI}_3$   
 4a:  $\text{MAZnI}_3$  4b:  $\text{MAGaI}_3$  4c:  $\text{MAGeI}_3$

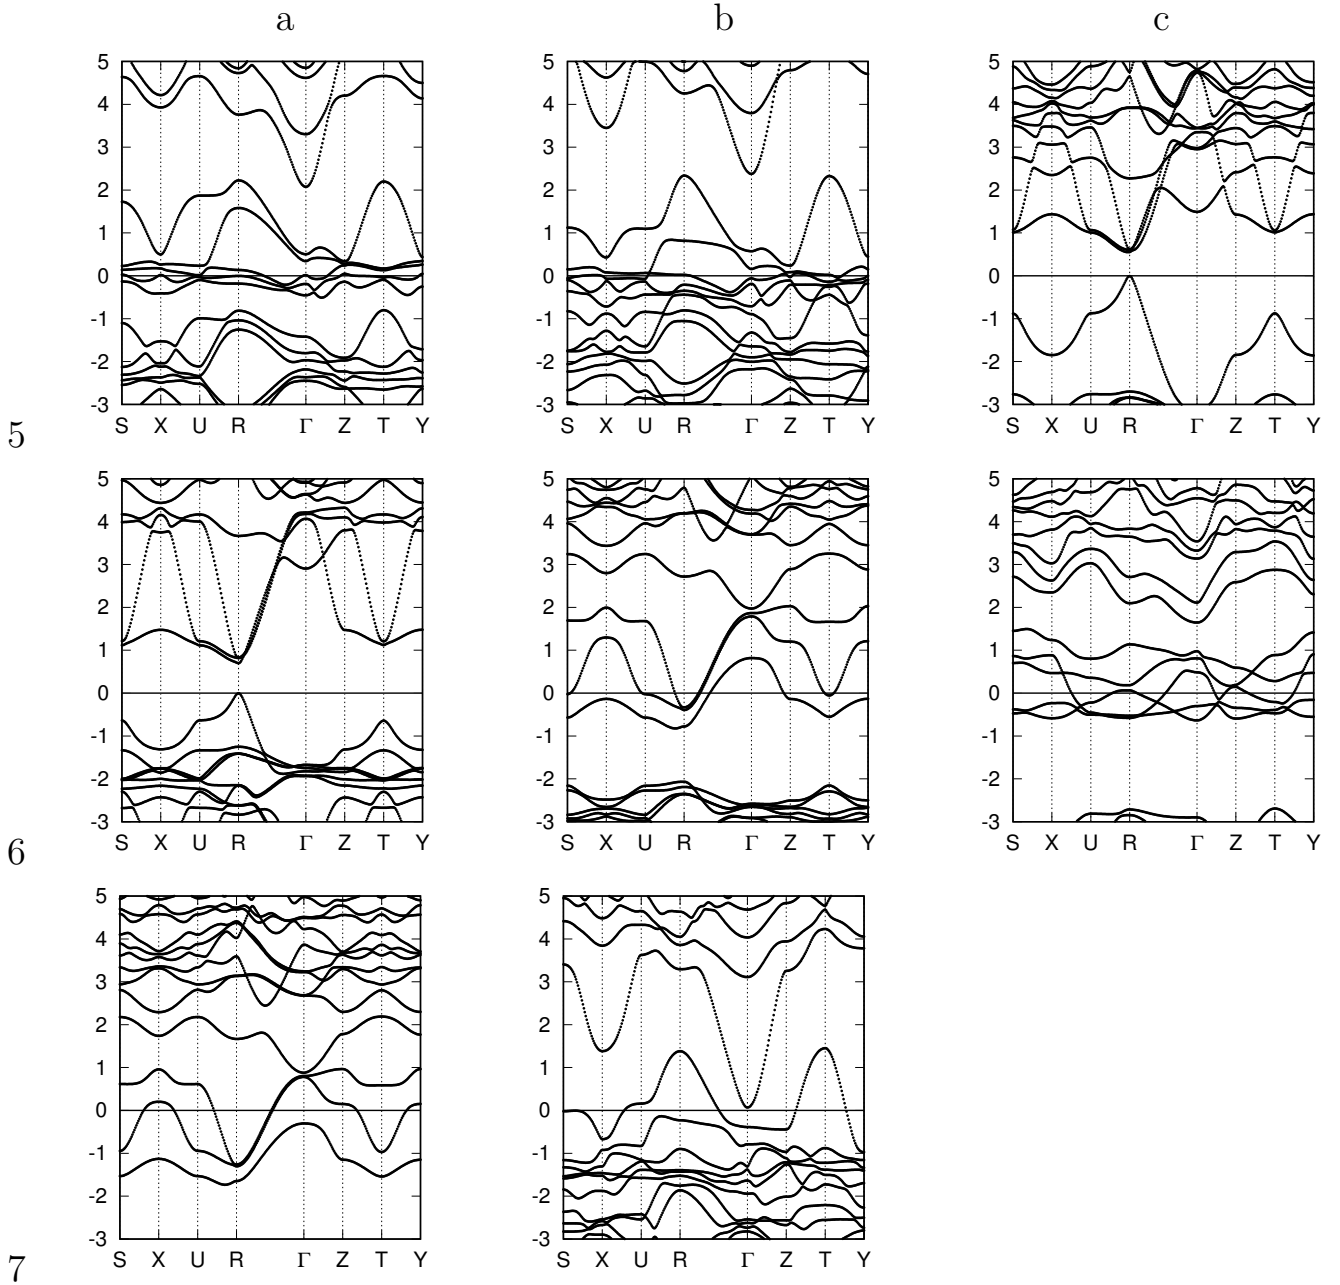

FIG. S6: Band structures shifted so the Fermi energy is at 0 eV

5a:  $\text{MARuI}_3$  5b:  $\text{MARhI}_3$  5c:  $\text{MAInI}_3$

6a:  $\text{MASnI}_3$  6b:  $\text{MASbI}_3$  6c:  $\text{MAWI}_3$

7a:  $\text{MABiI}_3$  7b:  $\text{MAPtI}_3$

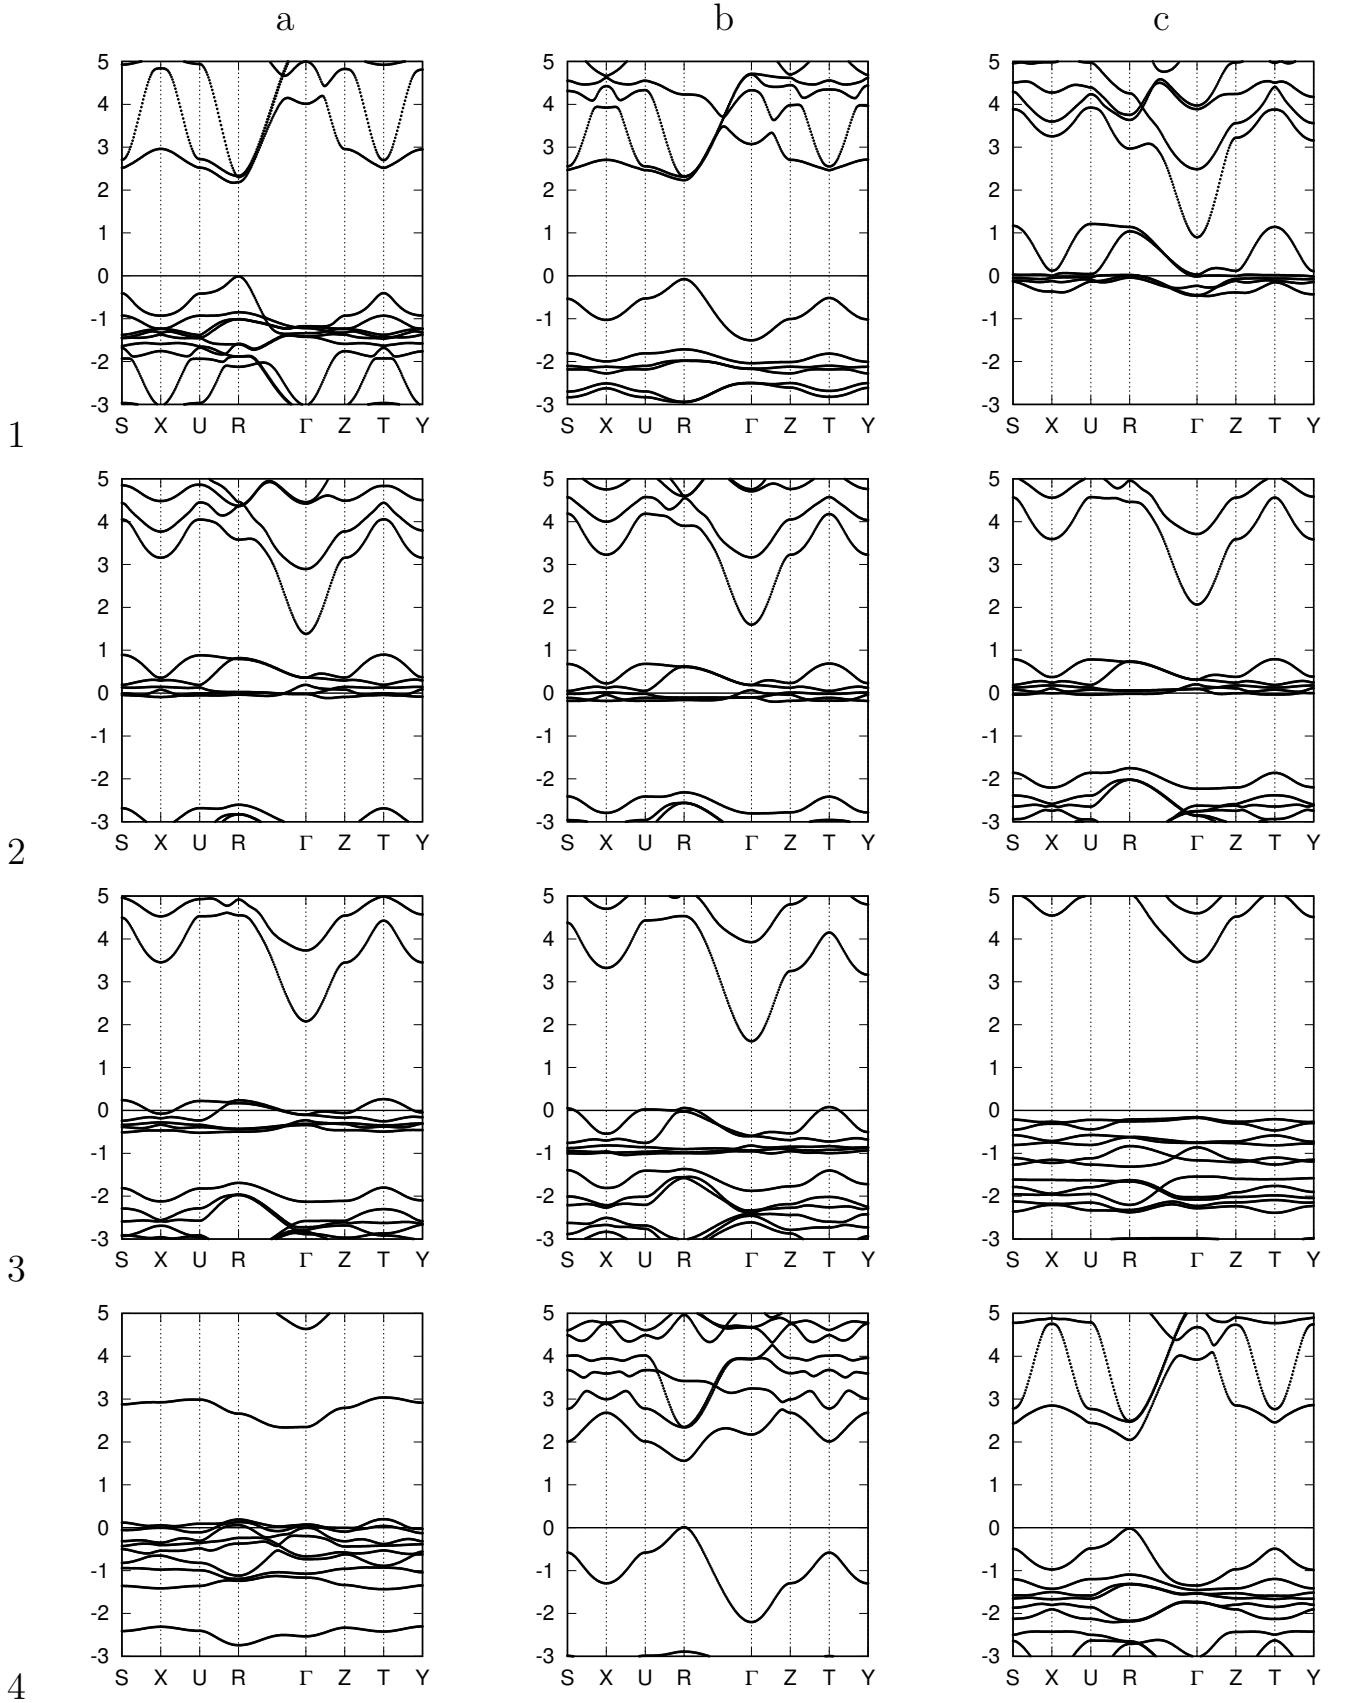

FIG. S7: Band structures shifted so the Fermi energy is at 0 eV

1a:  $\text{MAPbBr}_3$  1b:  $\text{MASiBr}_3$  1c:  $\text{MAVBr}_3$   
 2a:  $\text{MACrBr}_3$  2b:  $\text{MAMnBr}_3$  2c:  $\text{MAFeBr}_3$   
 3a:  $\text{MACoBr}_3$  3b:  $\text{MANiBr}_3$  3c:  $\text{MACuBr}_3$   
 4a:  $\text{MAZnBr}_3$  4b:  $\text{MAGaBr}_3$  4c:  $\text{MAGeBr}_3$
